# Supplementary material for: The influence of dynamic trajectories of red blood cell distribution width on prognosis and causal mediation analysis in sepsis patients: a longitudinal study with external validation
Source: Research Square preprint supplement (doi:10.21203/rs.3.rs-7984622/v1), 2025-12-02
Supplement: Supplementary file 1 [file 00a03903f47245cef619b2d8.docx]

Supplementary Table 3. Baseline characteristics of the external validation cohort

| Variables | Total (n = 627) | 1 (n = 351) | 2 (n = 187) | 3 (n = 89) | *P* |
| --- | --- | --- | --- | --- | --- |
|
| **Age(years)** | 61.93 ± 15.76 | 62.28 ± 15.74 | 61.67 ± 16.39 | 61.07 ± 14.59 | 0.782 |
| **Gender, n(%)** |  |  |  |  | 0.009 |
| Male | 400 (63.80) | 209 (59.54) | 136 (72.73) | 55 (61.80) |  |
| Female | 227 (36.20) | 142 (40.46) | 51 (27.27) | 34 (38.20) |  |
| **Height(cm)** | 169.00 (160.00, 171.83) | 168.38 (160.00,171.62) | 170.00 (164.50,172.00) | 165.00 (160.00,170.00) | <0.001 |
| **Weight(kg)** | 65.00 (59.25, 72.00) | 65.00 (60.00,70.83) | 66.69 (60.00,74.00) | 63.90 (57.01,70.00) | 0.067 |
| **Complications** |  |  |  |  |  |
| Hypertension, n(%) | 213 (33.97) | 121 (34.47) | 65 (34.76) | 27 (30.34) | 0.735 |
| Diabetes, n(%) | 145 (23.13) | 87 (24.79) | 35 (18.72) | 23 (25.84) | 0.228 |
| Coronary Disease, n(%) | 47 (7.50) | 28 (7.98) | 12 (6.42) | 7 (7.87) | 0.799 |
| Renal Disease, n(%) | 239 (38.12) | 123 (35.04) | 81 (43.32) | 35 (39.33) | 0.165 |
| Tumor, n(%) | 129 (20.57) | 64 (18.23) | 39 (20.86) | 26 (29.21) | 0.072 |
| Cerebrovascular Disease, n(%) | 184 (29.35) | 118 (33.62) | 44 (23.53) | 22 (24.72) | 0.029 |
| **Vital signs** |  |  |  |  |  |
| Temperature(°C) | 37.80 (37.20, 38.60) | 37.90 (37.30,38.70) | 37.80 (37.10,38.50) | 37.80 (37.00,38.40) | 0.145 |
| Respiratory rate (per minute) | 25.00 (20.50, 30.00) | 24.00 (20.00,29.50) | 25.00 (21.00,32.00) | 24.00 (21.00,28.00) | 0.082 |
| Heart Rate(per minute) | 118.00 (102.00, 135.00) | 118.00 (100.00,135.00) | 120.00 (104.50,135.50) | 115.00 (100.00,126.00) | 0.112 |
| Systolic blood pressure(mmHg) | 101.00 (92.00, 106.08) | 101.27 (94.28,106.89) | 99.91 (90.00,104.94) | 101.58 (90.00,106.27) | 0.122 |
| Diastolic blood pressure(mmHg) | 52.99 (49.00, 55.50) | 53.16 (50.00,56.00) | 52.00 (46.00,54.77) | 53.00 (49.00,55.00) | 0.003 |
| **Laboratory testing** |  |  |  |  |  |
| PH | 7.36 (7.30, 7.41) | 7.37 (7.31,7.41) | 7.33 (7.25,7.40) | 7.38 (7.32,7.43) | <0.001 |
| PaO2(mmHg) | 79.10 (46.90, 105.65) | 86.00 (63.20,109.76) | 60.80 (37.05,86.35) | 86.78 (52.20,120.90) | <0.001 |
| PaCO2(mmHg) | 41.40 (37.00, 46.83) | 40.87 (36.67,45.65) | 43.10 (38.46,49.95) | 39.73 (35.90,45.80) | <0.001 |
| Lactate(mmol/L) | 2.86 (2.22, 4.20) | 2.80 (2.22,3.88) | 3.14 (2.20,6.17) | 2.80 (2.26,3.91) | 0.009 |
| SPO2(%) | 95.00 (90.00, 98.00) | 95.00 (92.00,98.00) | 94.00 (88.00,97.00) | 96.00 (92.00,98.00) | <0.001 |
| WBC(*10⁹/L) | 12.06 (8.32, 17.53) | 12.06 (8.30,17.80) | 13.16 (9.29,18.94) | 10.65 (6.98,14.79) | 0.010 |
| Hemoglobin (g/L) | 90.00 (74.50, 110.00) | 95.00 (78.00,114.00) | 86.00 (72.50,107.00) | 82.00 (69.00,94.00) | <0.001 |
| Platelet(*10⁹/L) | 116.00 (61.00, 184.00) | 127.00 (73.00,190.00) | 110.00 (46.00,186.50) | 98.00 (43.00,165.00) | 0.006 |
| Lymphocytes(*10⁹/L) | 0.56 (0.33, 0.90) | 0.57 (0.34,0.90) | 0.49 (0.28,0.81) | 0.57 (0.37,0.97) | 0.135 |
| ALT(U/L) | 53.00 (27.00, 136.32) | 50.00 (26.00,123.94) | 64.00 (29.00,168.00) | 60.03 (27.00,112.19) | 0.152 |
| AST(U/L) | 72.25 (37.00, 216.38) | 71.00 (37.00,198.50) | 85.00 (37.50,274.77) | 71.00 (35.00,172.80) | 0.334 |
| Total bilirubin(mg/dL) | 23.80 (15.00, 41.23) | 22.51 (15.00,33.77) | 30.16 (14.90,61.23) | 26.40 (15.40,61.50) | <0.001 |
| Albumin(g/L) | 29.98 (27.11, 31.89) | 30.00 (27.30,31.70) | 30.00 (26.90,32.10) | 29.80 (26.10,32.50) | 0.918 |
| Creatinine (μmol/L) | 123.13 (72.61, 213.44) | 113.44 (66.02,202.29) | 161.00 (90.18,256.48) | 108.80 (68.50,187.10) | <0.001 |
| Bun (mmol/L) | 13.38 (9.00, 19.23) | 12.00 (8.20,17.70) | 15.60 (10.94,22.50) | 13.69 (10.10,19.10) | <0.001 |
| Potassium (mmol/L) | 4.22 (3.87, 4.52) | 4.19 (3.79,4.45) | 4.39 (4.00,4.75) | 4.19 (3.87,4.44) | <0.001 |
| Sodium (mmol/L) | 139.88 (137.37, 142.70) | 139.45 (136.93,142.05) | 140.36 (137.85,143.05) | 140.40 (138.70,143.52) | 0.002 |
| Chloride (mmol/L) | 104.31 (101.90, 106.70) | 104.39 (102.00,106.59) | 103.87 (101.37,106.55) | 105.08 (102.33,107.80) | 0.134 |
| Glucose(mmol/L) | 10.30 (8.43, 12.60) | 10.21 (8.19,12.27) | 10.80 (8.80,13.85) | 9.94 (8.55,12.20) | 0.021 |
| PT(s) | 16.40 (15.10, 19.00) | 16.14 (14.90,17.95) | 17.00 (15.40,21.10) | 16.60 (15.00,19.51) | <0.001 |
| APTT(s) | 44.10 (38.40, 53.35) | 43.40 (37.95,51.05) | 47.10 (39.60,57.80) | 44.90 (38.20,53.00) | 0.004 |
| Fibrinogen(g/L) | 3.83 (2.38, 5.24) | 4.14 (2.59,5.52) | 3.42 (2.05,4.90) | 3.20 (2.32,4.54) | <0.001 |
| D-dimer(mg/L) | 5.70 (2.60, 9.27) | 5.84 (2.69,9.22) | 5.95 (2.59,10.51) | 3.99 (2.34,7.98) | 0.120 |
| BNP(pg/mL) | 337.30 (113.30, 710.35) | 285.90 (94.05,563.55) | 481.46 (173.10,1083.46) | 354.00 (131.90,791.27) | <0.001 |
| **Scoring system** |  |  |  |  |  |
| APACHE II | 21.00 (16.00, 27.00) | 20.00 (15.00,25.00) | 25.00 (20.00,31.00) | 19.00 (15.00,25.00) | <0.001 |
| SOFA | 8.00 (6.00, 11.00) | 7.00 (5.00,10.00) | 10.00 (8.00,12.04) | 8.00 (5.00,10.00) | <0.001 |
