# Supplementary material for: The influence of dynamic trajectories of red blood cell distribution width on prognosis and causal mediation analysis in sepsis patients: a longitudinal study with external validation
Source: Research Square preprint supplement (doi:10.21203/rs.3.rs-7984622/v1), 2025-12-02
Supplement: Supplementary file 2 [file 35980c0ea5c0ab3d4e98d5d9.docx]

Supplementary Table 5. Relationship between RDW and survival in patients with sepsis

| Variables | Model 1 [HR (95% CI), p-value] | Model 2 [HR (95% CI), p-value] | Model 3 [HR (95% CI), p-value] | Model 4[HR (95% CI), p-value] |
| --- | --- | --- | --- | --- |
| **30-day survival** |  |  |  |  |
| Class 1 | Reference | Reference | Reference | Reference |
| Class 2 | 7.284(5.086,10.431),<0.001 | 7.127(4.963,10.235), <0.001 | 7.336(5.070,10.612),<0.001 | 5.998(4.081,8.816),<0.001 |
| Class 3 | 1.171(0.615,2.228),0.631 | 1.184(0.622,2.254),0.607 | 1.235(0.647,2.357),0.523 | 1.228(0.644,2.343),0.533 |

Model 1 was a non-adjusted model

Model 2 was adjusted for age, gender

Model 3 was adjusted for the same parameters as Model 2 with additional adjustments for comorbidities of Hypertension, Diabetes, Coronary Disease, Renal Disease, Tumor and Cerebrovascular Disease,

Model 4 was adjusted for the same parameters as Model 3 with additional adjustments for SOFA score andAPACHE II score

HR, hazard ratio; 95% CI, 95% confidence interval. The bold values indicate statistically significant values (p < 0.05)
