# Supplementary material for: The influence of dynamic trajectories of red blood cell distribution width on prognosis and causal mediation analysis in sepsis patients: a longitudinal study with external validation
Source: Research Square preprint supplement (doi:10.21203/rs.3.rs-7984622/v1), 2025-12-02
Supplement: Supplementary file 3 [file 46ed97fcc90bce52808a8739.docx]

**Supplemental Figure Legends**

**Supplementary Figure1**. *Flowchart of this study*

**Supplementary Figure 2.** *60-day Kaplan-Meier survival curves(A) and cumulative risk curves(B) by RDW trajectory class in patients with sepsis.*

**Supplementary Figure 3.** *90-day Kaplan-Meier survival curves(A) and cumulative risk curves(B) by RDW trajectory class in patients with sepsis.*

**Supplementary Figure 4.** *Causal mediation analysis of the effect of RDW trajectory on 60-day mortality in sepsis patients (A: Effect decomposition; B: Proportion of mediated effect; C: Sensitivity analysis of the average causal mediation effect (ACME) under varying assumptions of ρ)***Supplementary Figure 5.** *Causal mediation analysis of the effect of RDW trajectory on 90-day mortality in sepsis patients (A: Effect decomposition; B: Proportion of mediated effect; C: Sensitivity analysis of the average causal mediation effect (ACME) under varying assumptions of ρ)*

**Supplementary Figure 6.** *SHAP visualization of the first patient as an individual example**(A: Waterfall plot; B: Force plot) using the first patient as an example*

**Supplementary Figure 7.** *SHAP dependence plots*

**Supplementary Figure 8.** *Latent class trajectory analysis of red blood cell distribution width (RDW) in patients with sepsis of the external validation cohort*

**Supplementary Figure 9.** *30-day Kaplan-Meier survival curves(A) and cumulative risk curves(B) by RDW trajectory class in patients with sepsis of the external validation cohort*
