# Supplementary material for: The influence of dynamic trajectories of red blood cell distribution width on prognosis and causal mediation analysis in sepsis patients: a longitudinal study with external validation
Source: Research Square preprint supplement (doi:10.21203/rs.3.rs-7984622/v1), 2025-12-02
Supplement: Supplementary file 4 [file 7c97c04ac38468497bb59ff1.docx]

Supplementary Table 2. Fit statistics of LCTMs from 1 to 6 subclasses of the external validation cohort

| Model | Number of Class | AIC | BIC | Entropy | % Class 1 | % Class 2 | % Class 3 | % Class 4 | % Class 5 | % Class 6 |
| --- | --- | --- | --- | --- | --- | --- | --- | --- | --- | --- |
| LCTM-1 | 1 | 8432.843 | 8555.834 | 1 | 100.0 |  |  |  |  |  |
| LCTM-2 | 2 | 8389.318 | 8442.609 | 0.8559864 | 63.32 | 36.68 |  |  |  |  |
| LCTM-3 | 3 | 8121.785 | 8213.840 | 0.9312922 | 55.98 | 29.82 | 14.19 |  |  |  |
| LCTM-4 | 4 | 8303.985 | 8241.691 | 0.8863962 | 56.94 | 14.67 | 15.63 | 12.76 |  |  |
| LCTM-5 | 5 | 8683.987 | 8342.529 | 0.8633157 | 53.27 | 14.51 | 3.51 | 7.02 | 21.69 |  |
| LCTM-6 | 6 | 8889.318 | 8759.472 | 0.8192438 | 10.05 | 35.73 | 17.07 | 8.93 | 16.59 | 11.64 |

AIC: Akaike information criterion; BIC: Bayesian information criteria
