# Supplementary material for: The influence of dynamic trajectories of red blood cell distribution width on prognosis and causal mediation analysis in sepsis patients: a longitudinal study with external validation
Source: Research Square preprint supplement (doi:10.21203/rs.3.rs-7984622/v1), 2025-12-02
Supplement: Supplementary file 5 [file 9fa3e307ff91eac5cbddba2b.docx]

Supplementary Table 1. Fit statistics of LCTMs from 1 to 6 subclasses

| Model | Number of Class | Loglik | AIC | BIC | Entropy | % Class 1 | % Class 2 | % Class 3 | % Class 4 | % Class 5 | % Class 6 |
| --- | --- | --- | --- | --- | --- | --- | --- | --- | --- | --- | --- |
| LCTM-1 | 1 | -11764.6 | 20414.74 | 21973.58 | 1 | 100.0 |  |  |  |  |  |
| LCTM-2 | 2 | -9854.15 | 20295.61 | 20043.67 | 0.9058834 | 76.2 | 23.8 |  |  |  |  |
| LCTM-3 | 3 | -9451.97 | 19642.21 | 19435.46 | 0.9042422 | 76.1 | 20.9 | 3.00 |  |  |  |
| LCTM-4 | 4 | -9497.03 | 19739.02 | 19458.27 | 0.9032164 | 65.4 | 15.7 | 9.4 | 9.5 |  |  |
| LCTM-5 | 5 | -9400.54 | 19756.49 | 19460.26 | 0.9023759 | 77.3 | 10.4 | 5.7 | 5.5 | 1.1 |  |
| LCTM-6 | 6 | -9309.63 | 19853.25 | 19498.73 | 0.9019358 | 55.3 | 14.3 | 2.6 | 16.1 | 7.4 | 4.3 |

Loglik: Log-likelihood; AIC: Akaike information criterion; BIC: Bayesian information criteria
