# Supplementary material for: The influence of dynamic trajectories of red blood cell distribution width on prognosis and causal mediation analysis in sepsis patients: a longitudinal study with external validation
Source: Research Square preprint supplement (doi:10.21203/rs.3.rs-7984622/v1), 2025-12-02
Supplement: Supplementary file 6 [file a628a3ed34392c3e0c52a9b7.docx]

Supplementary Table 4. Outcomes between subgroups of the RDW trajectory of the external

validation cohort

| Variables | Total (n = 627) | 1 (n = 351) | 2 (n = 187) | 3 (n = 89) | *P* |
| --- | --- | --- | --- | --- | --- |
|
| **Main outcomes** |  |  |  |  |  |
| Duration of hospitalization(day) | 21.75 (13.14, 34.86) | 21.62 (13.69,34.98) | 21.67 (11.49,34.29) | 24.04 (13.07,35.70) | 0.806 |
| Duration of ICU(day) | 10.53 (5.94, 18.74) | 10.07 (5.77,17.44) | 12.03 (7.09,21.94) | 8.07 (5.08,18.10) | 0.008 |
| 30-day survival time(day) | 30.00 (26.63, 30.00) | 30.00 (30.00,30.00) | 23.45 (12.23,30.00) | 30.00 (30.00,30.00) | <0.001 |
| Hospital Outcome 30d, n(%) | 166 (26.518) | 41 (11.714) | 113 (60.428) | 12 (13.483) | <0.001 |
| ICU mortality, n(%) | 205 (32.70) | 42 (11.97) | 147 (78.61) | 16 (17.98) | <0.001 |
| Hospital mortality, n(%) | 242 (38.60) | 49 (13.96) | 174 (93.05) | 19 (21.35) | <0.001 |
| **Secondary outcomes** |  |  |  |  |  |
| Ventilation Time(day) | 0.79 (0.19, 6.39) | 0.98 (0.06,7.76) | 0.70 (0.38,3.48) | 0.81 (0.00,5.00) | 0.412 |
| CRRT, n(%) | 251 (40.03) | 105 (29.91) | 117 (62.57) | 29 (32.58) | <0.001 |
